# Supplementary material for: Adsorption of cesium and strontium on mesoporous silicas
Source: Royal Society of Chemistry journal article supplement (doi:10.1039/d3cp01442h), 2023-01-01
Supplement: d3cp01442h1.pdf [file d3cp01442h1.pdf]

**Electronic supplementary information**

**Adsorption of cesium and strontium on mesoporous silicas**

*Kento Murota*<sup>a\*</sup>, *Yoshio Takahashi*<sup>b</sup>, *Takumi Saito*<sup>c</sup>

a Regulatory Standard and Research Department, Secretariat of Nuclear Regulation Authority,  
1-9-9 Roppongi, Minato-ku, Tokyo 106-8450, Japan

b Department of Earth and Planetary Science, Graduate School of Science, The University of  
Tokyo, 7-3-1 Hongo, Bunkyo-ku, Tokyo 113-0033, Japan

c Nuclear Professional School, School of Engineering, The University of Tokyo, 2-22  
Shirakata Shirane, Tokai-mura, Naka-gun, Ibaraki 319-1188, Japan

Corresponding Author

\* E-mail: [murota\\_kento\\_zs6@nra.go.jp](mailto:murota_kento_zs6@nra.go.jp)

**Table S1** Textural properties and surface hydroxyl group densities of mesoporous silicas.<sup>1</sup>

|                                                    | MCM-41 |      |       |      | SBA-15 |      |
|----------------------------------------------------|--------|------|-------|------|--------|------|
|                                                    | M3.4   | M6.8 | M12.4 | S7.1 | S7.9   | S8.2 |
| Mesopore diameter (nm)                             | 3.4    | 6.8  | 12.4  | 7.1  | 7.9    | 8.2  |
| Specific surface area (m <sup>2</sup> /g)          | 622    | 628  | 431   | 456  | 481    | 535  |
| < 2 nm in diameter (m <sup>2</sup> /g)             | 32     | 414  | 94    | 232  | 246    | 252  |
| > 2 nm in diameter (m <sup>2</sup> /g)             | 589    | 214  | 337   | 224  | 236    | 284  |
| Surface hydroxyl group density (/nm <sup>2</sup> ) | 3.06   | 3.02 | 4.81  | 4.89 | 3.94   | 4.16 |

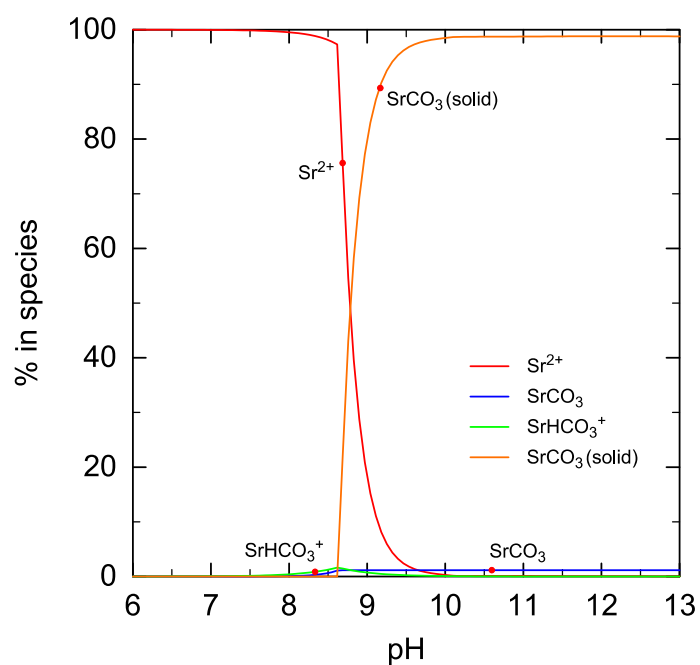**Fig. S1** Speciation of Sr<sup>2+</sup> in the absence of adsorption on silica surface calculated by PHREEQC.

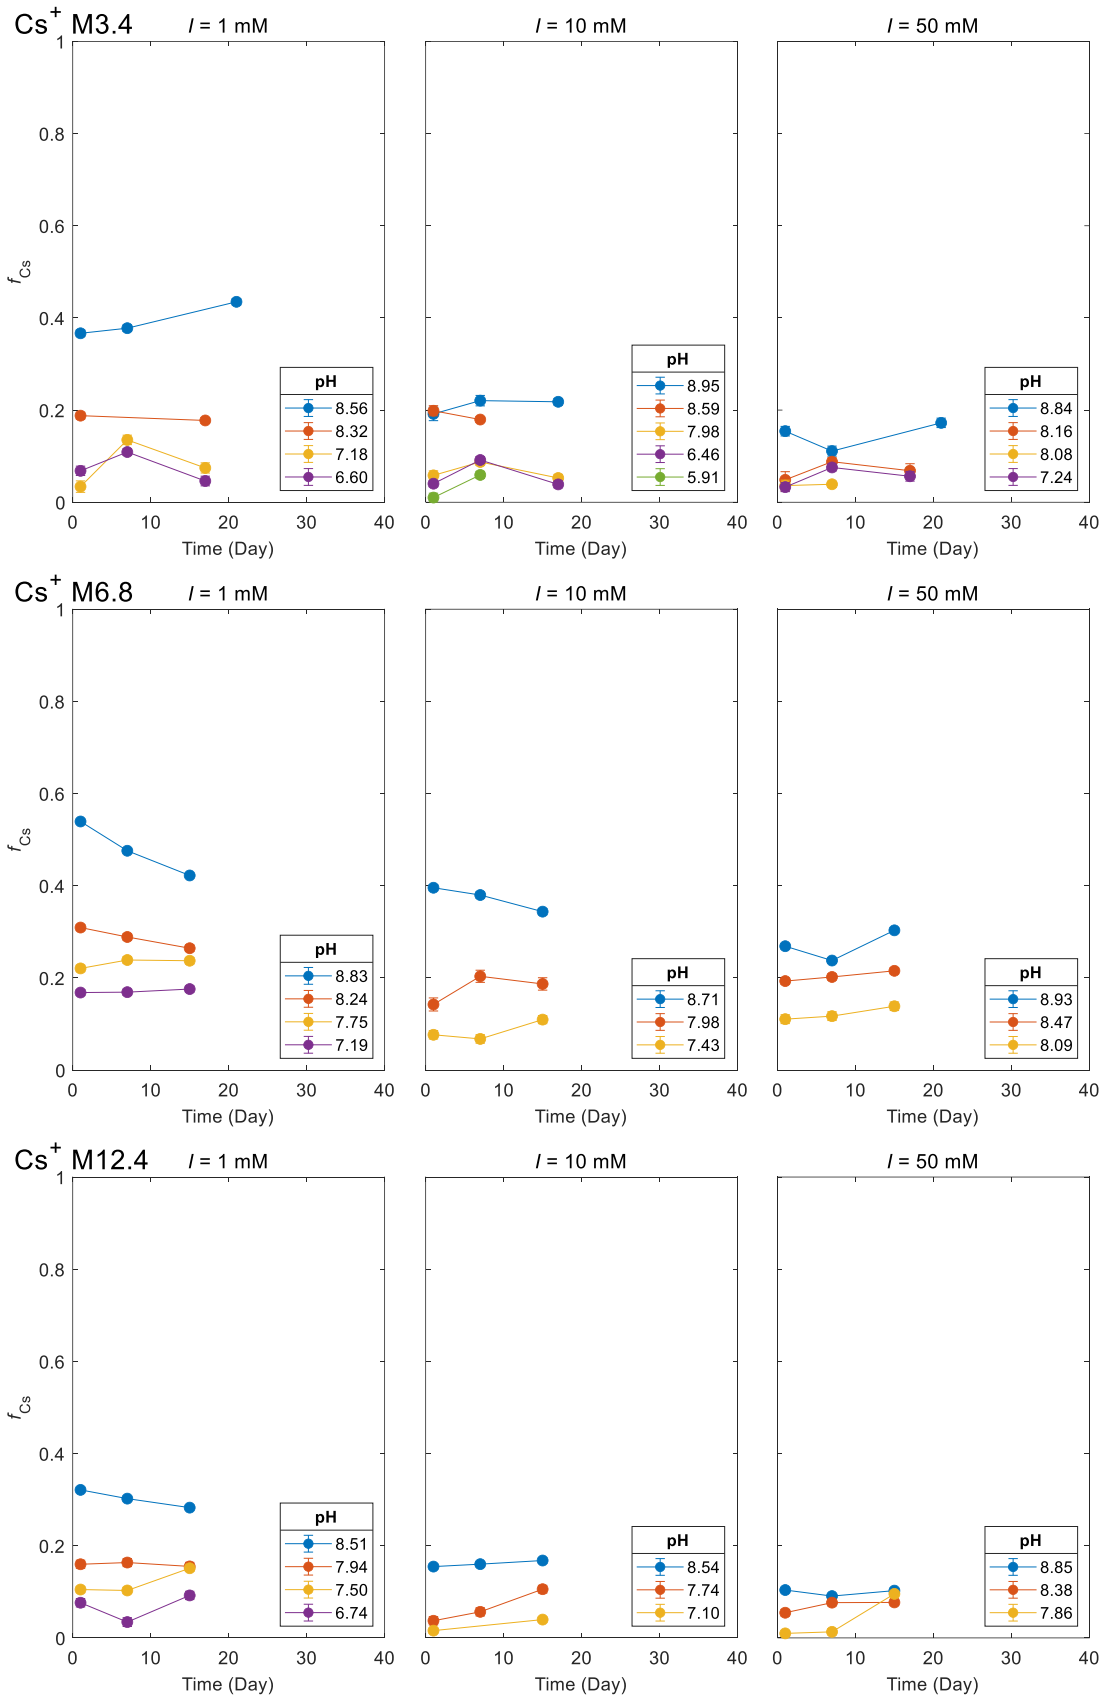

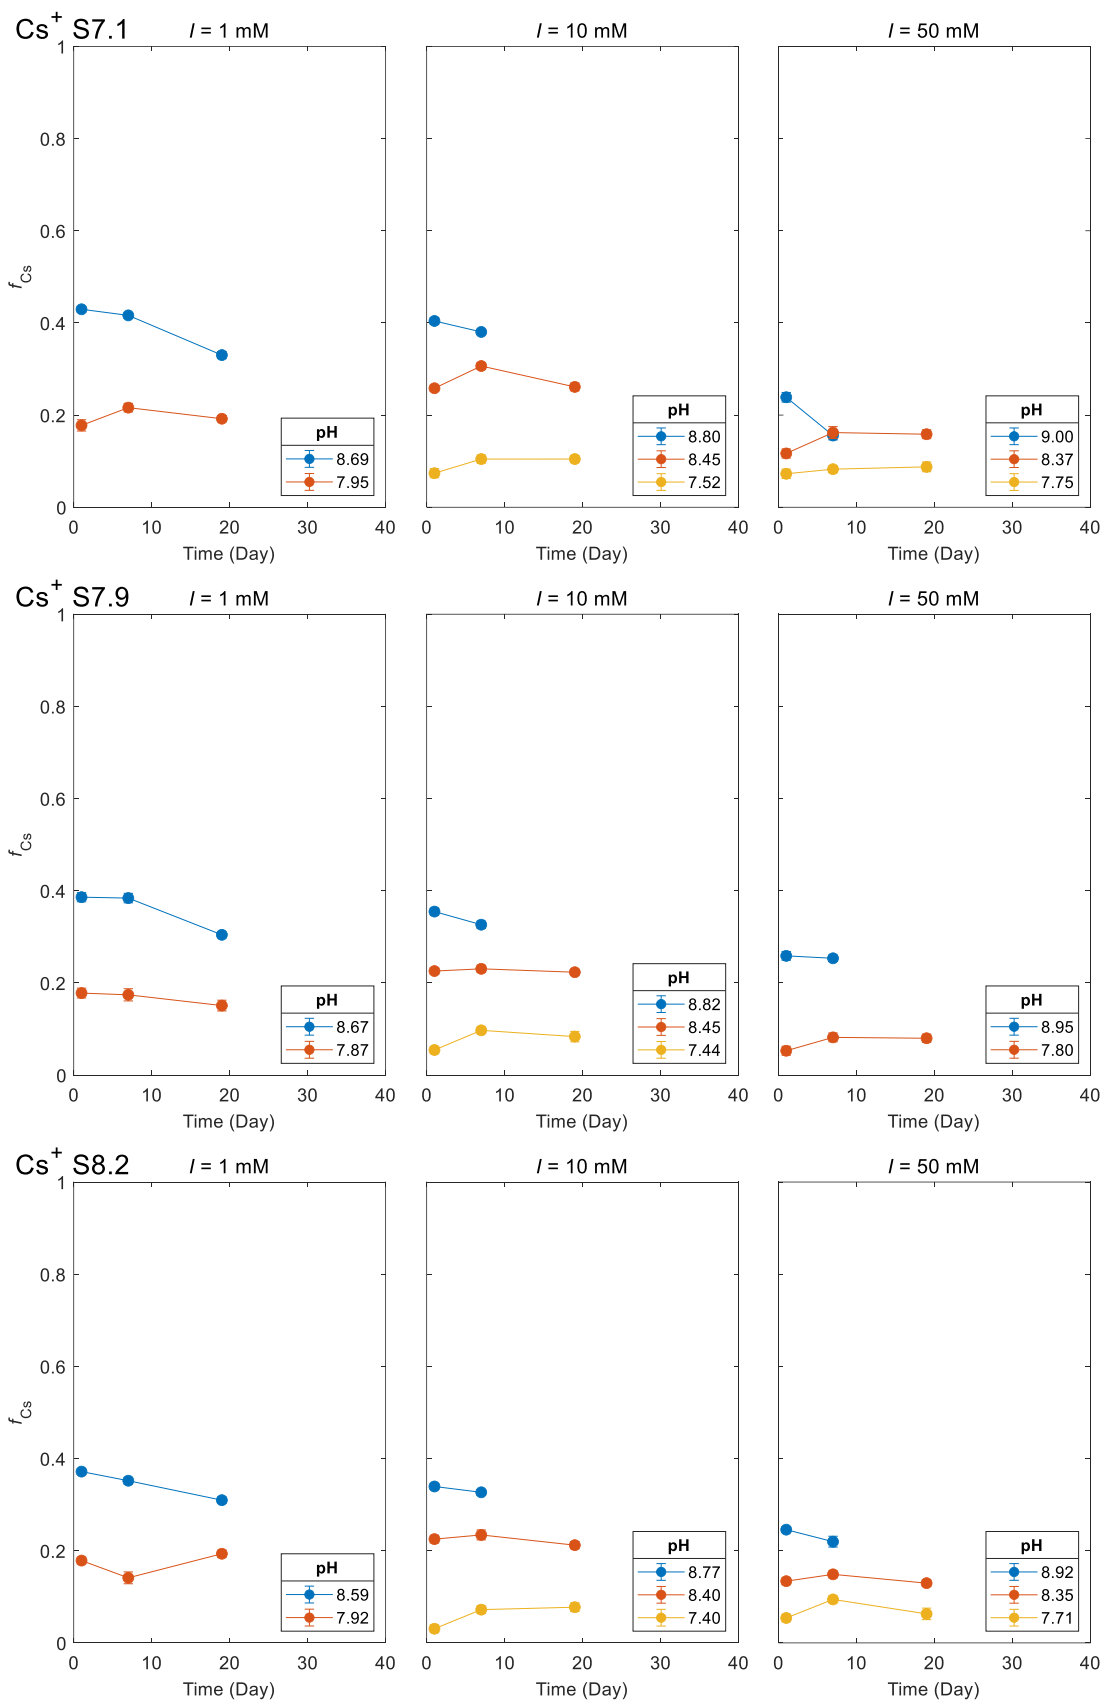

**Fig. S2** Time variation of adsorbed fractions of  $Cs^+$  ( $f_{Cs}$ ) on the six mesoporous silicas at different pH and ionic strengths of 1, 10, and 50 mM.

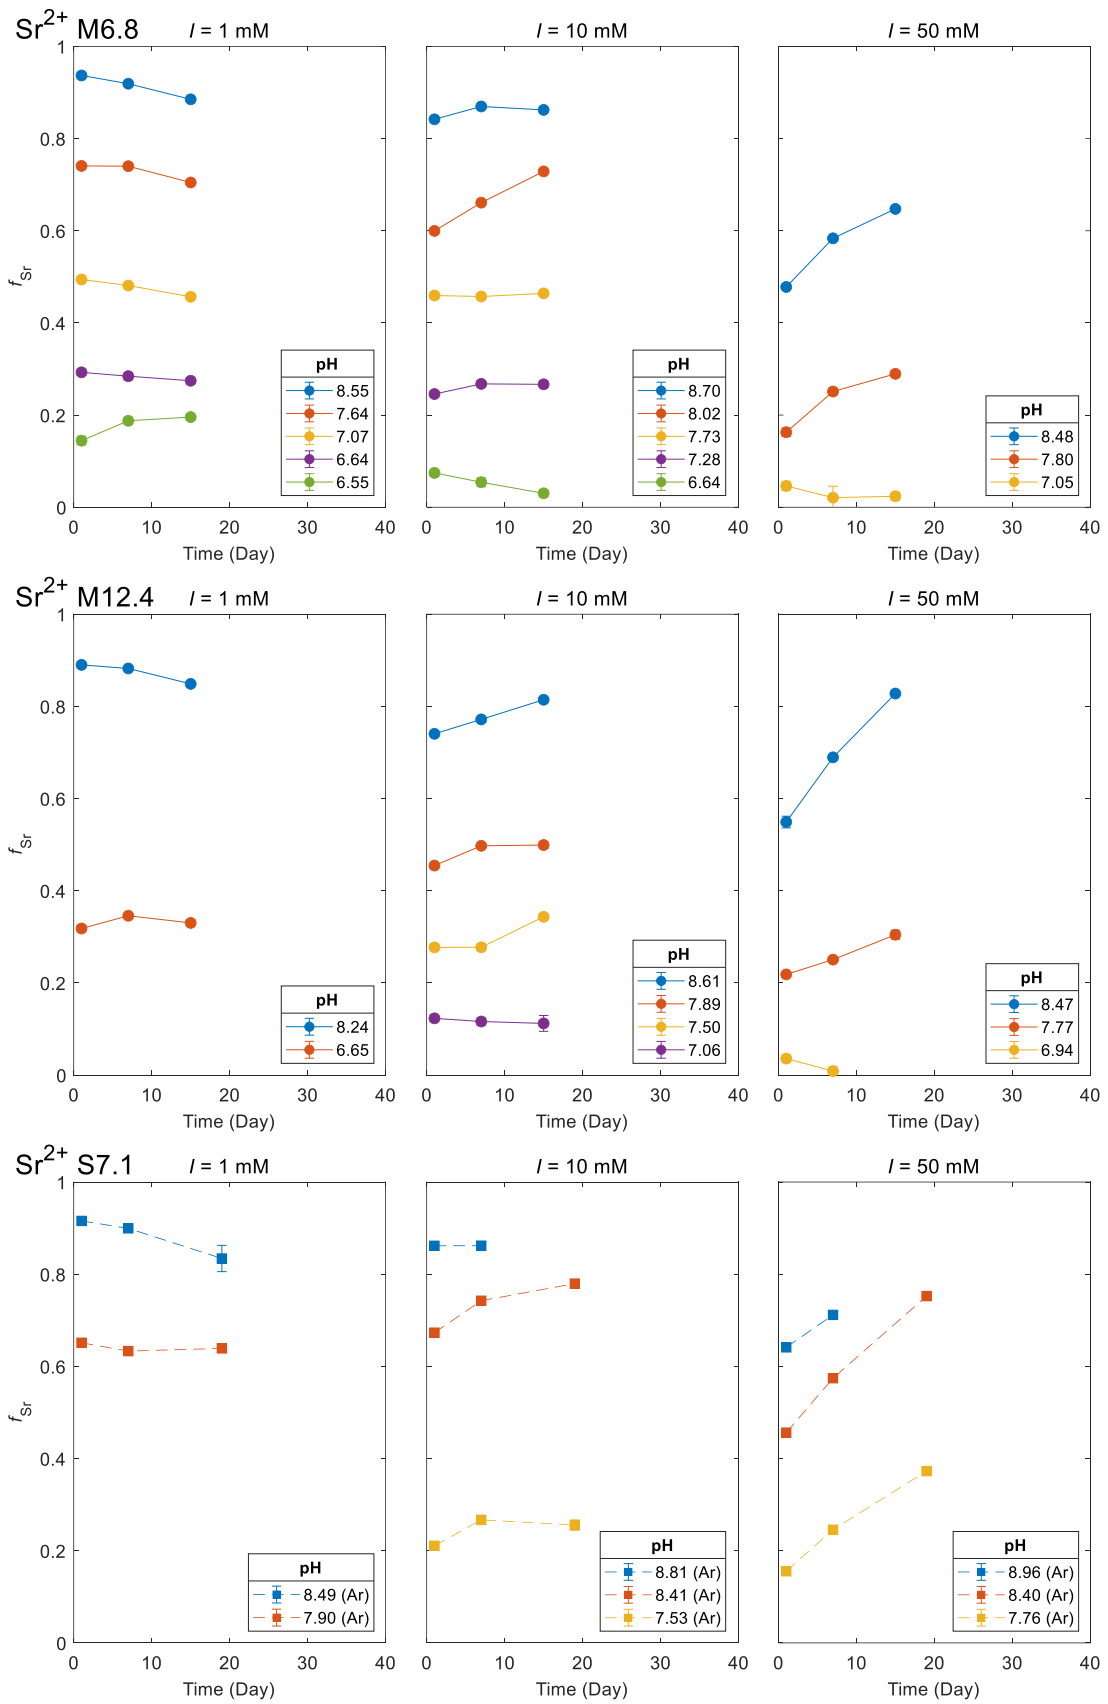

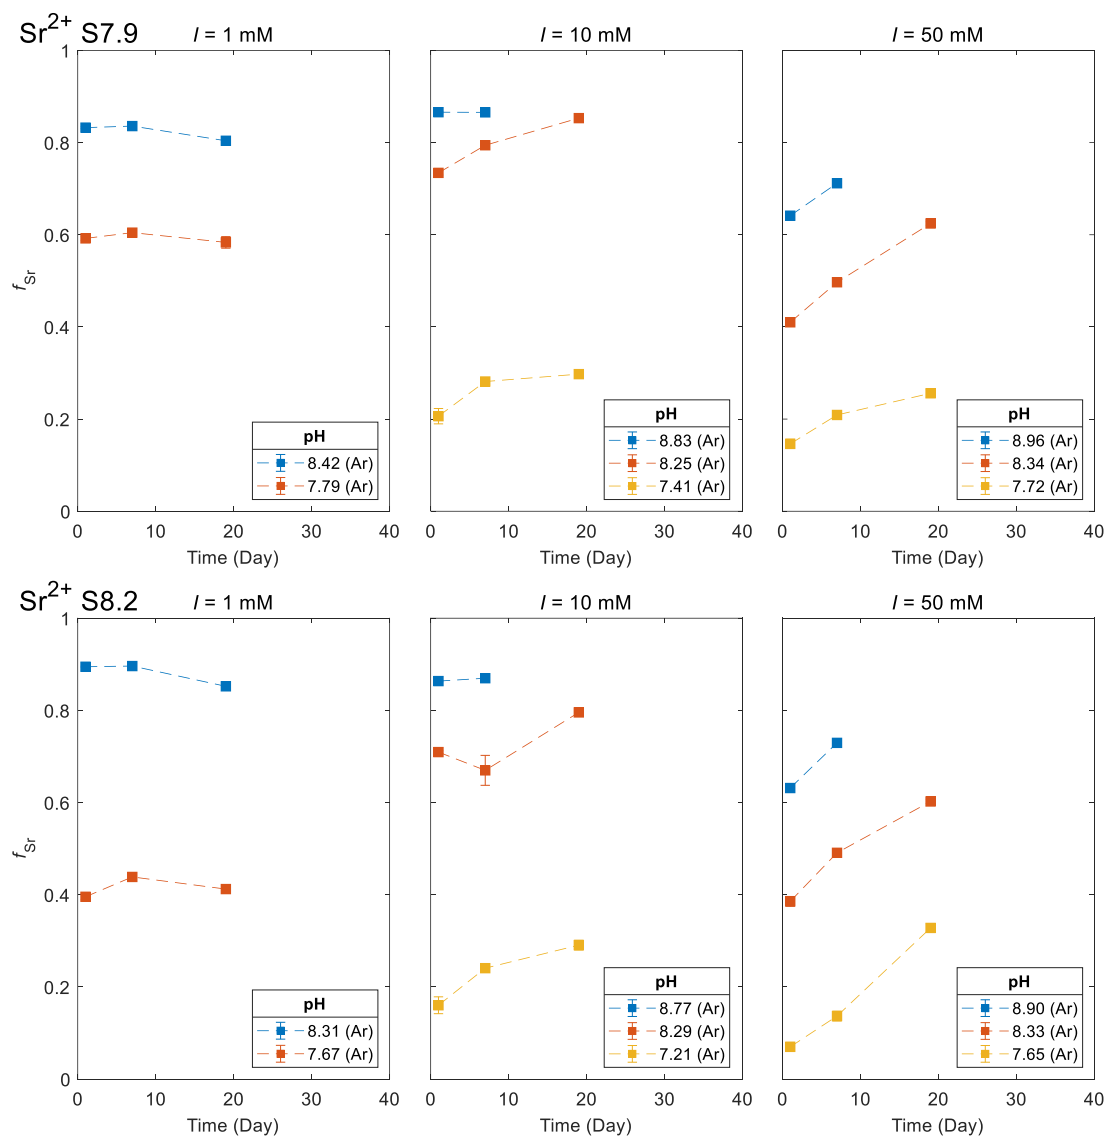

**Fig. S3** Time variation of adsorbed fractions of  $Sr^{2+}$  ( $f_{Sr}$ ) on the mesoporous silicas other than M3.4 at different pH and ionic strengths of 1, 10, and 50 mM. The results shown by the dashed line were obtained in an argon atmosphere.

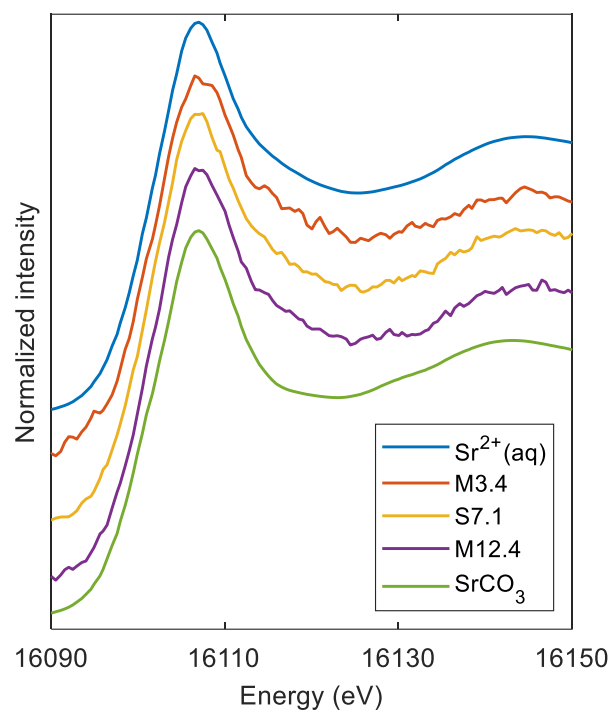

**Fig. S4** Sr K-edge XANES spectra of  $\text{Sr}^{2+}$  adsorbed on three types of mesoporous silicas.

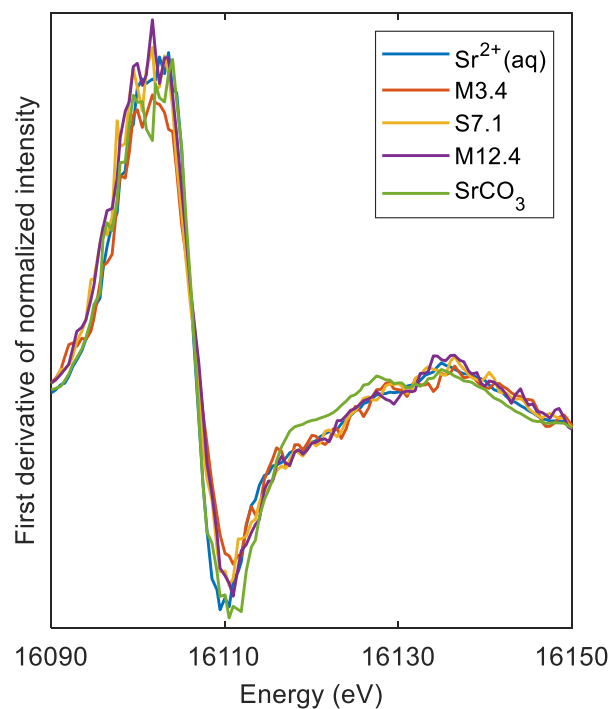

**Fig. S5** First derivatives of Sr K-edge XANES spectra of  $\text{Sr}^{2+}$  adsorbed on three types of mesoporous silicas.

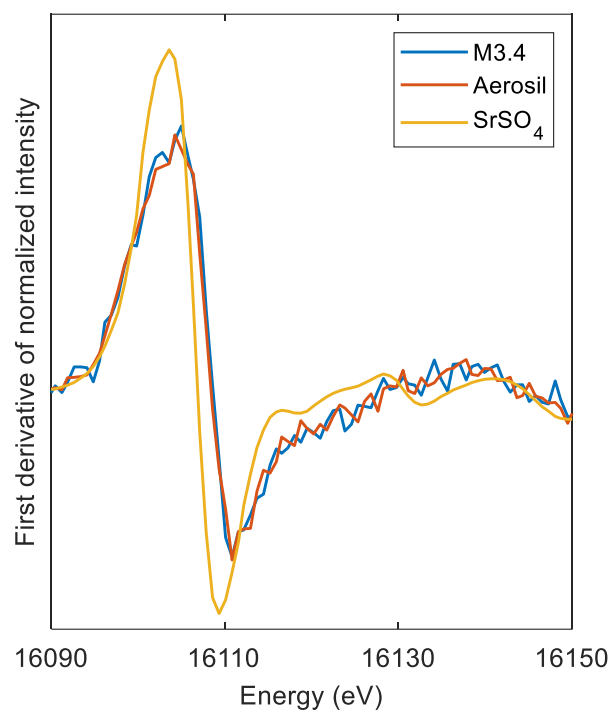

**Fig. S6** First derivatives of Sr K-edge XANES spectra of  $\text{Sr}^{2+}$  adsorbed on M3.4 and Aerosil OX50.

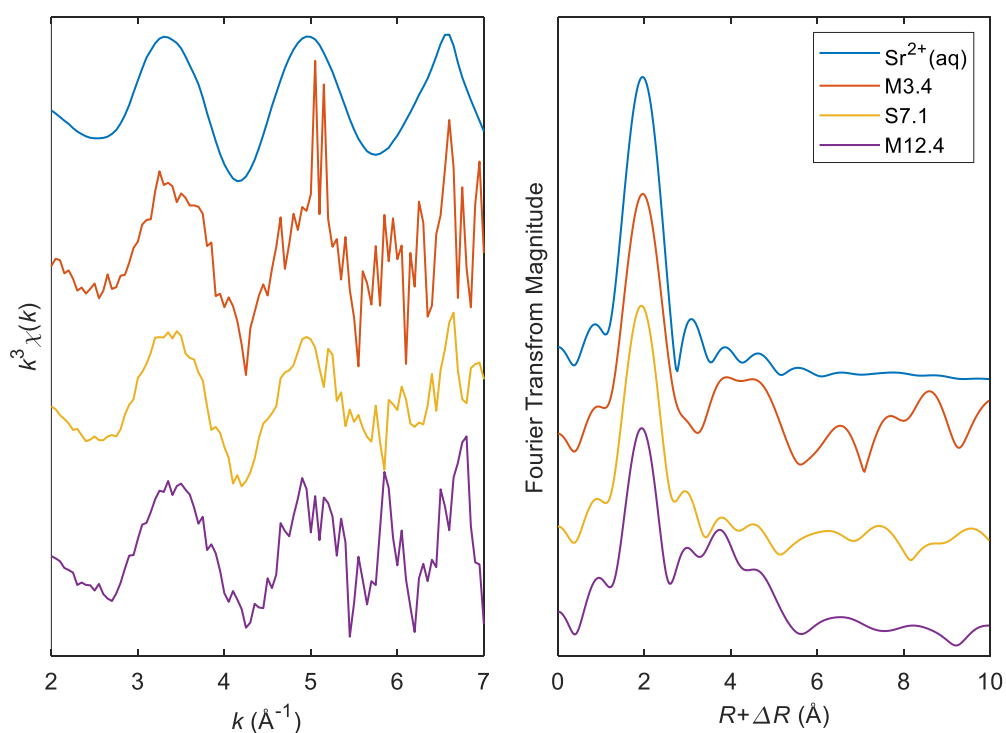

**Fig. S7**  $k^3$ -weighted Sr K-edge EXAFS spectra ( $k^3\chi(k)$ ) (left) and their Fourier transforms (right) of  $\text{Sr}^{2+}$  adsorbed on three types of mesoporous silicas.



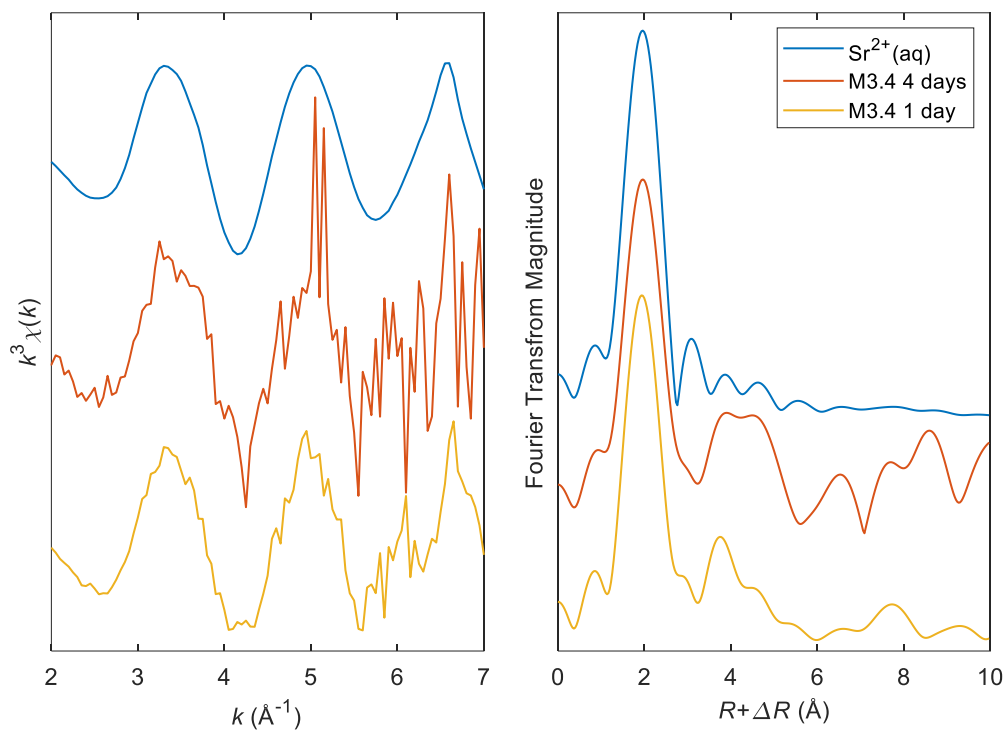

**Fig. S8**  $k^3$ -weighted Sr K-edge EXAFS spectra ( $k^3\chi(k)$ ) (left) and their Fourier transforms (right) of  $\text{Sr}^{2+}$  adsorbed on M3.4 for 1 or 4 days.

**Table S2** Capacitances of the Stern layer of pores with different diameters optimized by the fitting of the surface complexation model to the surface charge densities.<sup>1</sup>

|                                               |      |      |      |      |      |      |      |
|-----------------------------------------------|------|------|------|------|------|------|------|
| Pore diameter (nm)                            | 1.36 | 3.4  | 6.8  | 12.4 | 7.1  | 7.9  | 8.2  |
| Capacitance (F/m <sup>2</sup> )               | 0.56 | 1.05 | 5.58 | 3.80 | 4.53 | 2.27 | 4.04 |
| 95% confidential interval (F/m <sup>2</sup> ) | 0.36 | 0.11 | 9.61 | 1.84 | 3.30 | 1.17 | 1.15 |

## Charge distribution model

The outer-sphere complexation reactions of  $\text{Cs}^+$  (eqn (6) in the main text) assume that the adsorbed  $\text{Cs}^+$  resides on the outer Helmholtz plane (OHP). The distance of the OHP from the pore surface (the thickness of the Stern layer) is considered the sum of the thickness of the aligned water molecules in the Stern layer and the radius of the hydrated electrolyte ions adsorbed at the OHP.<sup>2,3</sup> When  $\text{Cs}^+$ , which has a smaller hydration radius than  $\text{Na}^+$ , forms outer-sphere complexes with the silica surface, adsorbed  $\text{Cs}^+$  is thought to be closer to the pore surface than the OHP, whose position is determined by the hydration radius of  $\text{Na}^+$ . In this case, it is necessary to calculate the adsorption reaction based on the potential corresponding to the position of adsorbed  $\text{Cs}^+$ . Furthermore, the potential at the position of adsorbed  $\text{Cs}^+$  may change with the pore size because the relative permittivity of water near the pore surface changes with the pore size.<sup>1</sup> Therefore, a model considering the distance of the adsorbed  $\text{Cs}^+$  from the pore surface was developed and fitted to the experimental results.

The model distributed the charge of  $\text{Cs}^+$  between the pore surface and OHP with a ratio  $f_{\text{charge}}$  according to the distance of the adsorbed  $\text{Cs}^+$  from the surface (**Fig. S6**).<sup>4</sup> In this case,  $\log K_{\text{int}}$  at each plane was assumed to be the same, but the apparent equilibrium constant ( $K_{\text{app}}$ ) changes as the potential ( $\psi_x = \psi_{\text{surface}}$  or  $\psi_{\text{OHP}}$ ) changes.

$$K_{\text{app}} = K_{\text{int}} \exp\left(-\frac{\Delta z F \psi_x}{RT}\right), \quad (\text{S1})$$

where  $\Delta z$  denotes the charge difference generated by adsorption,  $F$  represents Faraday's constant,  $R$  represents the gas constant, and  $T$  represents the temperature.

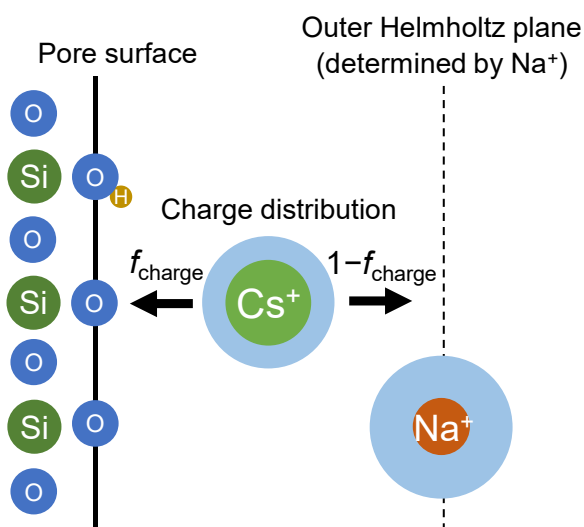

**Fig. S9** Conceptual diagram of the charge distribution model.

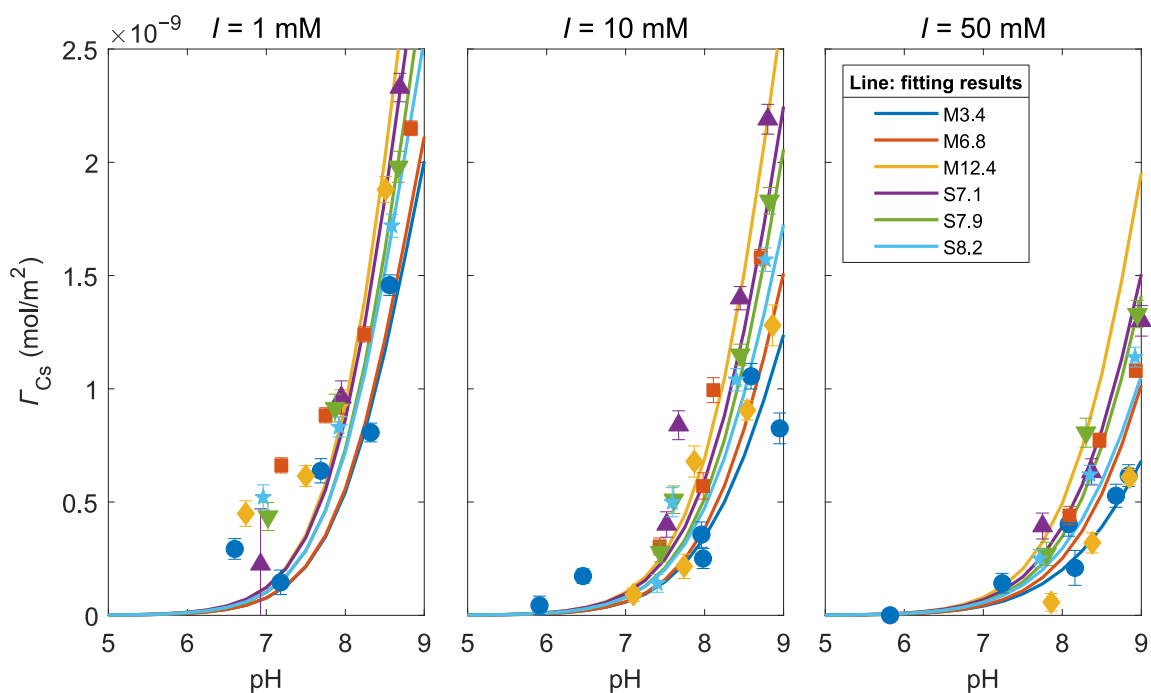

**Fig. S10** Fitting results for adsorbed amount of Cs<sup>+</sup> per unit surface area ( $\Gamma_{Cs}$ ) obtained from the adsorption experiments, with a common intrinsic equilibrium constant for the different sized pores.

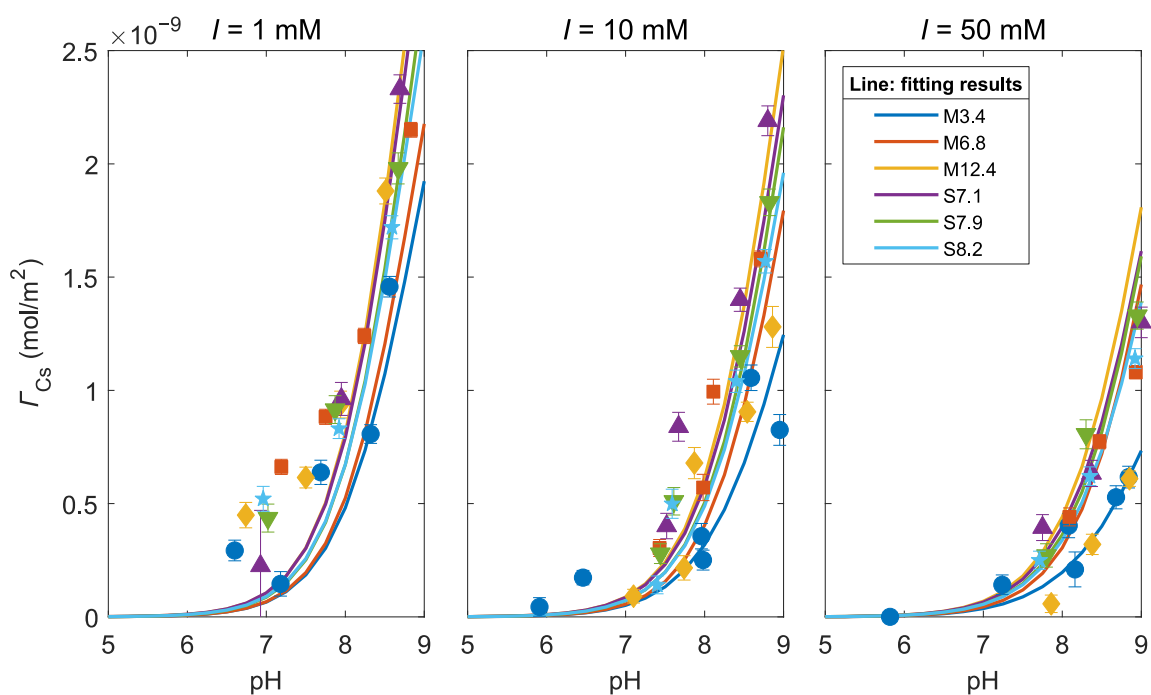

**Fig. S11** Fitting results for adsorbed amount of Cs<sup>+</sup> per unit surface area ( $\Gamma_{Cs}$ ) obtained from the adsorption experiments, with a common intrinsic equilibrium constant and different charge distribution fractions for the different sized pores.

**Table S3** Charge distribution fractions  $f_{\text{charge}}$  for different sized pores optimized by the fitting.

| Pore diameter (nm) | $f_{\text{charge}}$ |
|--------------------|---------------------|
| 1.36               | $0.3 \pm 1.6$       |
| 3.4                | $0.1 \pm 0.4$       |
| 7.1                | $0.1 \pm 1.6$       |
| 7.9                | $0.3 \pm 1.6$       |
| 8.2                | $0.3 \pm 1.1$       |
| 6.8                | $1.0 \pm 2.5$       |
| 12.4               | $0.0 \pm 0.6$       |

### A possible cause of the discrepancy between the experimental and model results

The possible cause of the discrepancy between the experimental and model results is the contribution of  $\text{Cs}^+$  or  $\text{Sr}^{2+}$  not adsorbed on the pore surface but present inside the pore.

The overlap of the electrical double layer in nano-sized pores decreases the electrostatic potential ( $\psi_{\text{pore}}$ ) inside the pore.<sup>1</sup> Therefore, the  $\text{Cs}^+$  or  $\text{Sr}^{2+}$  concentration inside the pore ( $C_{\text{pore}}$ ) would be larger than that in the bulk solution ( $C_{\text{bulk}}$ ). When the solution inside the pore and bulk solution are in chemical equilibrium (Gibbs free energies of the two are equal), it is called Donnan equilibrium, and the following equation holds.<sup>5</sup>

$$RT \ln \left( \frac{C_{\text{bulk}}}{C_0} \right) = RT \ln \left( \frac{C_{\text{pore}}}{C_0} \right) + zF\psi_{\text{pore}}, \quad (\text{S2})$$

where  $C_0$  denotes the concentration in the standard state (1 M). The potential at the center of the pore with a diameter of 10 nm is calculated to be approximately  $-0.1$  V At an ionic strength of 1 mM by the cylindrical one-dimensional Poisson–Boltzmann equation.<sup>1</sup> Assuming that the whole pore has this potential, the ratio  $C_{\text{pore}}/C_{\text{bulk}}$  is approximately 49 for  $\text{Cs}^+$ , confirming that a concentration difference occurs between the inside and outside of the pore. The calculated  $\Gamma$  from the results of adsorption experiments based on eqn (1) in the main text includes the difference in the concentration of  $\text{Cs}^+$  or  $\text{Sr}^{2+}$  between the inside and outside of the pore. This explanation is supported by the fact that the discrepancy between the experimental and model results was significant at low ionic strengths when the potential inside the pores decreases significantly because of the overlap of the electrical double layer. In addition, it is reasonable that the discrepancy between the experimental and calculated results was greater for  $\text{Sr}^{2+}$  (**Fig. 2**) than for  $\text{Cs}^+$  (**Fig. 1**) because  $C_{\text{pore}}/C_{\text{bulk}}$  increases to the square as the valence increases from one to two.

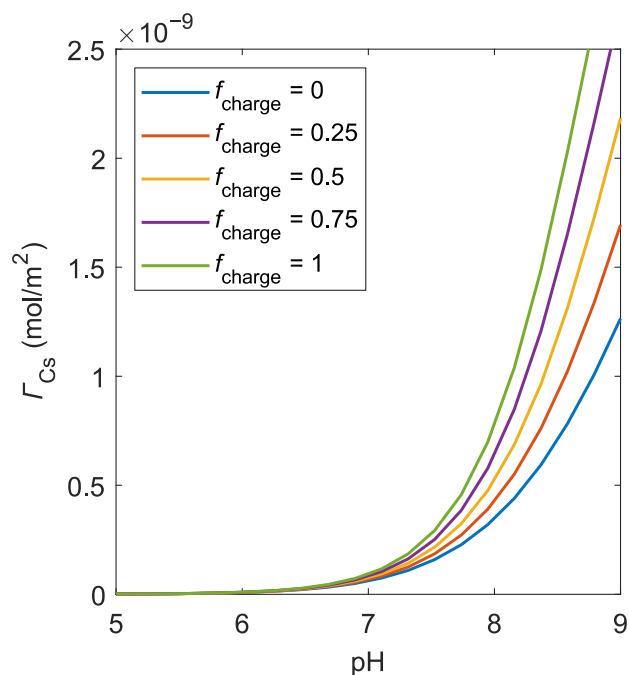

**Fig. S12** Calculated adsorbed amount of  $Cs^+$  per unit surface area ( $\Gamma_{Cs}$ ) for different charge distribution fractions  $f_{charge}$ . Pore diameter, ionic strength, capacitance of Stern layer, surface hydroxyl density, and  $\log K_{int}$  were set to 5 nm, 10 mM, 1 C/m<sup>2</sup>, 4 /nm<sup>2</sup>, and 0.7, respectively.

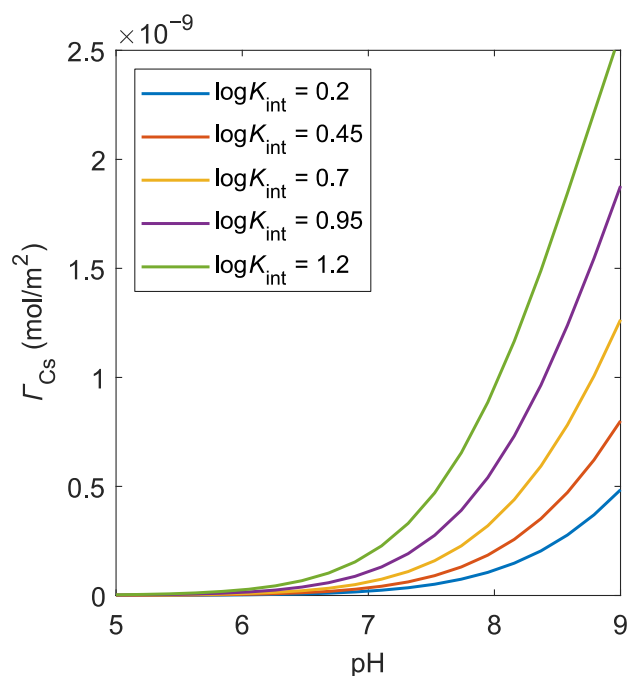

**Fig. S13** Calculated adsorbed amount of  $Cs^+$  per unit surface area ( $\Gamma_{Cs}$ ) for different  $\log K_{int}$ . Pore diameter, ionic strength, capacitance of Stern layer, and surface hydroxyl density were set to 5 nm, 10 mM, 1 C/m<sup>2</sup>, and 4 /nm<sup>2</sup>, respectively.

### References in the Supplementary material

- 1 K. Murota and T. Saito, Pore size effects on surface charges and interfacial electrostatics of mesoporous silicas, *Phys. Chem. Chem. Phys.*, 2022, **24**, 18073–18082.
- 2 D. A. Sverjensky, Interpretation and prediction of triple-layer model capacitances and the structure of the oxide-electrolyte-water interface, *Geochim. Cosmochim. Acta*, 2001, **65**, 3643–3655.
- 3 M. A. Brown, Z. Abbas, A. Kleibert, R. G. Green, A. Goel, S. May and T. M. Squires, Determination of surface potential and electrical double-layer structure at the aqueous electrolyte-nanoparticle interface, *Phys. Rev. X*, 2016, **6**, 1–12.
- 4 R. Rahnemaie, T. Hiemstra and W. H. Van Riemsdijk, A new surface structural approach to ion adsorption: Tracing the location of electrolyte ions, *J. Colloid Interface Sci.*, 2006, **293**, 312–321.
- 5 R. B. Schoch, J. Han and P. Renaud, Transport phenomena in nanofluidics, *Rev. Mod. Phys.*, 2008, **80**, 839–883.
